# Supplementary material for: Improving distribution models of riparian vegetation with mobile laser scanning and hydraulic modelling
Source: PLoS One. 2019 Dec 5;14(12):e0225936. doi: 10.1371/journal.pone.0225936 (PMC6894786; doi:10.1371/journal.pone.0225936)
Supplement: S3 Table — The highest value (and thus the fluvial disturbance variable selected for multivariate modelling for each response variable) is highlighted with grey background colour. Peak water depth in 2016 and in 2009–2016 were not selected for any models and are therefore not shown in this table. (XLSX) [file pone.0225936.s003.xlsx]

## Sheet: Sheet1
Nylén et al. Improving distribution models of riparian vegetation with mobile laser scanning and hydraulic modelling. PlosOne
S3 Table. Spearman rank correlation between response variables and fluvial disturbance variables. The highest value (and thus the fluvial disturbance variable selected for multivariate modelling for each response variable) is highlighted with grey background colour. Peak water depth in 2016 and in 2009-2016 were not selected for any models and are therefore not shown in this table.
		Peak stream power
Type	Group / species	2016	2009-16	Time since flood
SR	Total	-0.408623	-0.408257	0.32
SR	Lichen	-0.29	-0.44	0.497533
SR	Bryophyte	-0.31	-0.33	0.26
SR	Graminoid	-0.19	-0.18	0.12
SR	Forb	-0.21	-0.08	-0.06
SR	Dwarf shrub	-0.52	-0.63	0.61
SR	Shrub	-0.26	-0.19	0.05
DI	Total	-0.433127	-0.479664	0.394409
DI	Lichen	-0.28	-0.43	0.47766
DI	Bryophyte	-0.43	-0.46	0.4
DI	Graminoid	-0.3	-0.34	0.26
DI	Forb	-0.23	-0.14	0.02
DI	Dwarf shrub	-0.54	-0.61	0.58
DI	Shrub	-0.26	-0.17	0.02
AB	Total	-0.35	-0.33	0.22
AB	Lichen	-0.29	-0.44	0.494402
AB	Bryophyte	-0.44	-0.52	0.48
AB	Graminoid	-0.27	-0.23	0.11
AB	Forb	-0.26	-0.12	-0.02
AB	Dwarf shrub	-0.5	-0.59	0.58
AB	Shrub	-0.22	-0.15	0.01
SR = species richness
DI = species distribution
AB = abundance
